# Supplementary material for: Ring opening of 2-aza-3-borabicyclo[2.2.0]hex-5-ene, the Dewar form of 1,2-dihydro-1,2-azaborine: stepwise versus concerted mechanisms
Source: PubMed Central journal article supplement (PMC3678608; doi:10.3762/bjoc.9.86), 2013-04-18
Supplement: Beilstein_J_Org_Chem-09-761-s001.pdf [file Beilstein_J_Org_Chem-09-761-s001.pdf]

# Supporting Information

for

## **Ring opening of 2-aza-3-borabicyclo[2.2.0]hex-5-ene, the Dewar form of 1,2-dihydro-1,2-azaborine: stepwise versus concerted mechanisms**

Holger F. Bettinger\* and Otto Hauler

Address: Institut für Organische Chemie, Universität Tübingen, Auf der Morgenstelle 18, 72072 Tübingen, Germany

Email: Holger F. Bettinger - [holger.bettinger@uni-tuebingen.de](mailto:holger.bettinger@uni-tuebingen.de)

\*Corresponding author

### **Additional data**

#### Table of Contents

|                                                                                      |    |
|--------------------------------------------------------------------------------------|----|
| 1. Cartesian coordinates of stationary points computed at CCSD(T)/TZ2P. ....         | S2 |
| 2. Cartesian coordinates of stationary points computed at CASSCF(6,6)/6-31G*. ....   | S3 |
| 3. Cartesian coordinates of dimers of <b>3</b> computed at SCS-RIMP2/def2-TZVP. .... | S4 |
| 4. Geometries of dimers of <b>3</b> . ....                                           | S6 |

# 1. Cartesian coordinates of stationary points computed at CCSD(T)/TZ2P.

12  
2-Aza-3-bora-bicyclo[2.2.0]hexa-5-ene, 3

|   |           |           |           |
|---|-----------|-----------|-----------|
| C | -1.246668 | -0.752826 | -0.266716 |
| C | -1.379721 | 0.589622  | -0.283038 |
| C | -0.103115 | 0.878375  | 0.515334  |
| B | 1.281588  | 0.776253  | -0.323082 |
| N | 1.308130  | -0.621550 | -0.198095 |
| C | 0.038228  | -0.702867 | 0.562392  |
| H | 0.089895  | -1.244579 | 1.504911  |
| H | -0.188610 | 1.450443  | 1.436815  |
| H | -2.098676 | 1.252150  | -0.747569 |
| H | -1.788040 | -1.564332 | -0.734096 |
| H | 2.041542  | 1.509965  | -0.868856 |
| H | 1.812997  | -1.393776 | -0.595988 |

12  
1,2-Dihydro-1,2-Azaborine, 4

|   |           |           |          |
|---|-----------|-----------|----------|
| C | -1.139809 | -0.930717 | 0.000000 |
| B | 0.293769  | -1.439628 | 0.000000 |
| N | 1.297479  | -0.413701 | 0.000000 |
| C | 1.010472  | 0.930276  | 0.000000 |
| C | -0.284936 | 1.369339  | 0.000000 |
| C | -1.363196 | 0.429445  | 0.000000 |
| H | 1.849704  | 1.612874  | 0.000000 |
| H | -2.003040 | -1.587172 | 0.000000 |
| H | -2.373915 | 0.825883  | 0.000000 |
| H | -0.479159 | 2.432402  | 0.000000 |
| H | 0.656735  | -2.574152 | 0.000000 |
| H | 2.276990  | -0.648047 | 0.000000 |

12  
MIN1

|   |           |           |           |
|---|-----------|-----------|-----------|
| N | -1.512141 | -0.345668 | 0.394886  |
| B | -0.806361 | 1.080786  | -0.056225 |
| C | 0.678776  | 1.194200  | -0.026993 |
| C | 1.502574  | -0.004725 | 0.178307  |
| C | 0.783153  | -1.132171 | -0.036104 |
| C | -0.560588 | -0.704455 | -0.507544 |
| H | -1.145418 | -0.550784 | 1.326124  |
| H | -1.571508 | 1.882445  | -0.477638 |
| H | 1.175707  | 2.127540  | -0.282424 |
| H | 2.525341  | 0.018970  | 0.536677  |
| H | 1.018305  | -2.145520 | 0.258510  |
| H | -0.806673 | -0.630617 | -1.562275 |

12  
MIN2

|   |           |           |           |
|---|-----------|-----------|-----------|
| C | 0.784556  | 1.147003  | -0.061634 |
| B | -0.707850 | 1.083538  | -0.010237 |
| N | -1.472461 | -0.250666 | 0.458336  |
| C | -0.612846 | -0.665648 | -0.527416 |
| C | 0.689694  | -1.155105 | 0.005175  |
| C | 1.515394  | -0.093947 | 0.166957  |
| H | -0.885877 | -0.742588 | -1.576817 |
| H | 1.314972  | 2.049134  | -0.355714 |
| H | 2.531192  | -0.138739 | 0.541344  |
| H | 0.801428  | -2.151024 | 0.412788  |
| H | -1.446351 | 1.916056  | -0.430581 |
| H | -2.424163 | -0.145555 | 0.116690  |

12  
TS3

|   |           |           |           |
|---|-----------|-----------|-----------|
| C | -0.325862 | 1.153348  | 0.148622  |
| C | -1.478313 | 0.307297  | -0.294744 |
| C | -1.068539 | -0.929269 | 0.023780  |
| C | 0.282608  | -0.606974 | 0.597942  |
| B | 1.136665  | 0.845030  | -0.137682 |
| N | 1.384866  | -0.638700 | -0.336781 |
| H | -0.532628 | 1.992081  | 0.813153  |
| H | 0.521681  | -0.732238 | 1.646821  |
| H | -2.377877 | 0.646250  | -0.791424 |
| H | -1.459908 | -1.913474 | -0.194989 |
| H | 2.003430  | 1.557607  | 0.260915  |
| H | 1.026701  | -1.006744 | -1.213988 |

12  
TS4

|   |           |           |           |
|---|-----------|-----------|-----------|
| C | 0.270748  | 1.373246  | 0.062090  |
| C | -1.081069 | 0.844822  | -0.111696 |
| C | -1.386917 | -0.506650 | -0.090383 |
| C | -0.152044 | -1.113671 | 0.404456  |

|   |           |           |           |
|---|-----------|-----------|-----------|
| N | 0.922836  | -1.023898 | -0.338438 |
| B | 1.451269  | 0.503934  | 0.111539  |
| H | 0.347763  | 2.453204  | 0.131331  |
| H | 0.012846  | -1.255399 | 1.475174  |
| H | -1.912974 | 1.540116  | -0.183250 |
| H | -2.387803 | -0.897076 | 0.001607  |
| H | 2.620122  | 0.657685  | 0.216663  |
| H | 0.616923  | -0.894290 | -1.306556 |

12  
TS5

|   |           |           |           |
|---|-----------|-----------|-----------|
| C | 0.416558  | 1.158332  | -0.148259 |
| B | -1.053027 | 0.889261  | 0.130380  |
| N | -1.361740 | -0.554668 | 0.413899  |
| C | -0.332812 | -0.624983 | -0.585605 |
| C | 0.998021  | -0.985784 | 0.005804  |
| C | 1.504081  | 0.230788  | 0.259613  |
| H | -0.572009 | -0.773099 | -1.633283 |
| H | 0.649367  | 2.017531  | -0.775507 |
| H | 2.439067  | 0.510795  | 0.726731  |
| H | 1.301287  | -1.977118 | 0.313271  |
| H | -1.901537 | 1.620826  | -0.276508 |
| H | -2.281864 | -0.767212 | 0.047899  |

12  
TS6

|   |           |           |           |
|---|-----------|-----------|-----------|
| C | -0.877941 | -1.136811 | -0.121632 |
| B | 0.571819  | -1.243393 | -0.019314 |
| N | 1.472361  | 0.099937  | 0.403689  |
| C | 0.729848  | 0.810781  | -0.425596 |
| C | -0.626754 | 1.217229  | 0.042333  |
| C | -1.474732 | 0.171025  | 0.144728  |
| H | 1.122006  | 1.152775  | -1.385421 |
| H | -1.514578 | -1.984801 | -0.342059 |
| H | -2.496996 | 0.292720  | 0.485207  |
| H | -0.787988 | 2.228482  | 0.390674  |
| H | 1.346325  | -2.097875 | -0.304452 |
| H | 2.412631  | -0.044973 | 0.046475  |

## 2. Cartesian coordinates of stationary points computed at CASSCF(6,6)/6-31G\*.

12  
2-Aza-3-bora-bicyclo[2.2.0]hexa-5-ene, 3

|   |           |           |           |
|---|-----------|-----------|-----------|
| C | -0.239026 | 0.918960  | 0.387615  |
| C | -1.444453 | 0.257965  | -0.268883 |
| C | -1.032307 | -1.005711 | -0.066603 |
| C | 0.239297  | -0.588145 | 0.650208  |
| B | 1.106296  | 0.958365  | -0.507401 |
| N | 1.421072  | -0.362784 | -0.182772 |
| H | -0.413768 | 1.597682  | 1.212444  |
| H | 0.436996  | -0.972524 | 1.642306  |
| H | -2.287753 | 0.678905  | -0.785735 |
| H | -1.401942 | -1.965645 | -0.378204 |
| H | 1.667891  | 1.730137  | -1.216633 |
| H | 2.041544  | -1.065493 | -0.520004 |

12  
1,2-Dihydro-1,2-Azaborine, 4

|   |           |           |          |
|---|-----------|-----------|----------|
| C | -0.852678 | 1.070677  | 0.000000 |
| C | 0.842766  | -1.207971 | 0.000000 |
| C | -0.519498 | -1.334147 | 0.000000 |
| C | -1.378927 | -0.180560 | 0.000000 |
| H | -1.466139 | 1.951869  | 0.000000 |
| H | 1.438894  | -2.105550 | 0.000000 |
| H | -0.987546 | -2.305005 | 0.000000 |
| H | -2.446307 | -0.301478 | 0.000000 |
| B | 1.451558  | 0.201658  | 0.000000 |
| H | 2.612786  | 0.470986  | 0.000000 |
| N | 0.512335  | 1.263347  | 0.000000 |
| H | 0.817242  | 2.212271  | 0.000000 |

12  
TS1

|   |           |           |           |
|---|-----------|-----------|-----------|
| C | -1.134097 | -0.855982 | -0.188232 |
| C | 0.173402  | -0.993628 | 0.517799  |
| C | -0.216708 | 1.209815  | 0.311219  |
| C | -1.393103 | 0.459388  | -0.220718 |
| H | 0.224975  | -0.992247 | 1.590982  |
| H | -0.399295 | 2.030086  | 0.990084  |
| H | -2.256847 | 0.944565  | -0.645899 |
| H | -1.672794 | -1.658172 | -0.660071 |
| B | 1.228157  | 0.841494  | -0.237425 |
| N | 1.334612  | -0.549837 | -0.195340 |

|   |          |           |           |
|---|----------|-----------|-----------|
| H | 2.082556 | 1.590279  | -0.602907 |
| H | 1.959478 | -1.188774 | -0.635875 |

12

TS2

|   |           |           |           |
|---|-----------|-----------|-----------|
| C | -1.134097 | -0.855982 | -0.188232 |
| C | 0.173402  | -0.993628 | 0.517799  |
| C | -0.216708 | 1.209815  | 0.311219  |
| C | -1.393103 | 0.459388  | -0.220718 |
| H | 0.224975  | -0.992247 | 1.590982  |
| H | -0.399295 | 2.030086  | 0.990084  |
| H | -2.256847 | 0.944565  | -0.645899 |
| H | -1.672794 | -1.658172 | -0.660071 |
| B | 1.228157  | 0.841494  | -0.237425 |
| N | 1.334612  | -0.549837 | -0.195340 |
| H | 2.082556  | 1.590279  | -0.602907 |
| H | 1.959478  | -1.188774 | -0.635875 |

### 3. Cartesian coordinates of dimers of **3** computed at SCS-RIMP2/def2-TZVP.

24

DIM1

|   |           |           |           |
|---|-----------|-----------|-----------|
| C | 3.213611  | -0.226836 | 0.676286  |
| C | 3.262779  | -0.208884 | -0.671777 |
| C | 1.948674  | 0.513861  | -0.848413 |
| C | 1.924582  | 0.556086  | 0.728473  |
| H | 1.923927  | 1.434477  | -1.435003 |
| H | 1.877788  | 1.485747  | 1.298276  |
| H | 3.810715  | -0.700118 | 1.448198  |
| H | 3.950283  | -0.647126 | -1.388491 |
| C | -3.262779 | 0.208884  | 0.671777  |
| C | -1.948674 | -0.513861 | 0.848413  |
| C | -1.924582 | -0.556086 | -0.728473 |
| C | -3.213611 | 0.226836  | -0.676286 |
| H | -1.923927 | -1.434477 | 1.435003  |
| H | -1.877788 | -1.485747 | -1.298276 |
| H | -3.950283 | 0.647126  | 1.388491  |
| H | -3.810715 | 0.700118  | -1.448198 |
| N | 0.701609  | -0.296038 | 0.875723  |
| H | 0.762572  | -1.033289 | 1.571321  |
| N | -0.701609 | 0.296038  | -0.875723 |
| H | -0.762572 | 1.033289  | -1.571321 |
| B | -0.660503 | 0.490281  | 0.764822  |
| H | -0.659725 | 1.599924  | 1.233192  |
| B | 0.660503  | -0.490281 | -0.764822 |
| H | 0.659725  | -1.599924 | -1.233192 |

24

DIM2

|   |           |           |           |
|---|-----------|-----------|-----------|
| C | -2.792348 | -0.652449 | -0.304267 |
| C | -2.769426 | 0.682613  | -0.486689 |
| C | -1.260972 | 0.787305  | -0.567844 |
| C | -1.287838 | -0.779273 | -0.385268 |
| H | -0.830920 | 1.243273  | -1.456047 |
| H | -0.840072 | -1.475653 | -1.094049 |
| H | -3.570921 | -1.371497 | -0.071845 |
| H | -3.548299 | 1.438865  | -0.486049 |
| C | 1.675124  | -0.714865 | -1.416077 |
| C | 2.006159  | -0.898285 | 0.050147  |
| C | 2.075607  | 0.674094  | 0.070244  |
| C | 1.691612  | 0.634743  | -1.387321 |
| H | 2.897997  | -1.481341 | 0.289060  |
| H | 2.996605  | 1.183723  | 0.355571  |
| H | 1.463983  | 1.409827  | -2.109794 |
| H | 1.473981  | -1.425871 | -2.211990 |
| N | -0.665772 | -0.790627 | 0.979113  |
| H | -1.201436 | -1.304764 | 1.669961  |
| N | 0.989493  | 0.909658  | 1.087064  |
| H | 1.299348  | 1.469582  | 1.871851  |
| B | -0.586027 | 0.880728  | 0.917492  |
| H | -1.104768 | 1.488226  | 1.817102  |
| B | 0.883735  | -0.740187 | 1.239829  |
| H | 1.162500  | -1.164685 | 2.330166  |

24

DIM3

|   |          |           |           |
|---|----------|-----------|-----------|
| C | 1.357266 | -0.515089 | -1.504113 |
| C | 1.579927 | -1.066458 | -0.112724 |
| C | 2.017398 | 0.411427  | 0.220451  |
| C | 1.698884 | 0.756047  | -1.206883 |
| H | 2.310236 | -1.874612 | -0.028663 |
| H | 3.017403 | 0.613538  | 0.606718  |
| H | 1.675250 | 1.695181  | -1.748398 |
| H | 1.020652 | -0.987455 | -2.420838 |

|   |           |           |           |
|---|-----------|-----------|-----------|
| N | -0.982760 | -0.700175 | 1.267297  |
| H | -1.377944 | -1.080383 | 2.118908  |
| N | 0.982760  | 0.700175  | 1.267297  |
| H | 1.377944  | 1.080383  | 2.118908  |
| C | -1.357266 | 0.515089  | -1.504113 |
| C | -1.579927 | 1.066458  | -0.112724 |
| C | -2.017398 | -0.411427 | 0.220451  |
| C | -1.698884 | -0.756047 | -1.206883 |
| H | -1.675250 | -1.695181 | -1.748398 |
| H | -1.020652 | 0.987455  | -2.420838 |
| H | -2.310236 | 1.874612  | -0.028663 |
| H | -3.017403 | -0.613538 | 0.606718  |
| B | -0.579121 | 0.921219  | 1.187494  |
| H | -0.948801 | 1.547786  | 2.146520  |
| B | 0.579121  | -0.921219 | 1.187494  |
| H | 0.948801  | -1.547786 | 2.146520  |

24

TS7

|   |           |           |           |
|---|-----------|-----------|-----------|
| C | -3.535731 | -0.579938 | 0.041315  |
| C | -3.456900 | 0.761280  | 0.146282  |
| C | -2.030310 | 0.863828  | -0.368074 |
| C | -2.133158 | -0.707362 | -0.527593 |
| H | -1.827616 | 1.507269  | -1.223598 |
| H | -1.990484 | -1.204985 | -1.488880 |
| H | -4.276967 | -1.314534 | 0.335748  |
| H | -4.134466 | 1.513247  | 0.537127  |
| C | 3.456911  | -0.761259 | -0.146313 |
| C | 2.030338  | -0.863829 | 0.368086  |
| C | 2.133163  | 0.707362  | 0.527597  |
| C | 3.535719  | 0.579960  | -0.041359 |
| H | 1.827677  | -1.507273 | 1.223615  |
| H | 1.990513  | 1.204987  | 1.488887  |
| H | 4.134479  | -1.513215 | -0.537179 |
| H | 4.276933  | 1.314568  | -0.335818 |
| N | -1.054975 | -0.911438 | 0.462291  |
| H | -0.935627 | -1.755760 | 1.003884  |
| N | 1.054945  | 0.911416  | -0.462253 |
| H | 0.935561  | 1.755736  | -1.003843 |
| B | 0.924781  | -0.498268 | -0.752718 |
| H | 0.460953  | -1.033265 | -1.711210 |
| B | -0.924781 | 0.498244  | 0.752752  |
| H | -0.460958 | 1.033230  | 1.711254  |

#### 4. Geometries of dimers of **3**.

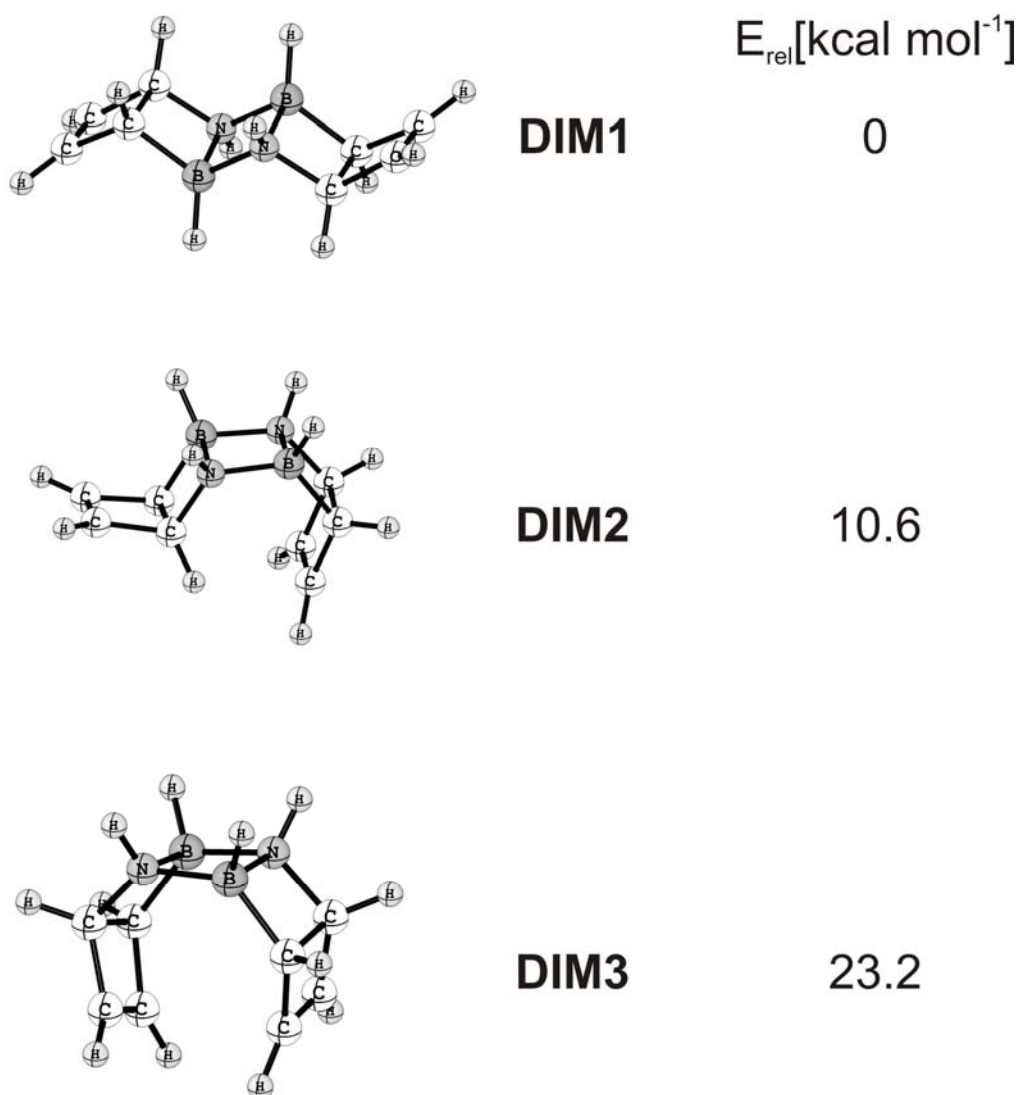

**Figure S1:** Computed geometries of dimers of **3** and energy relative to the most stable DIM1 as computed at the SCS-RIMP2/def2-TZVP level of theory.
